# Supplementary material for: Immature excitatory neurons develop during adolescence in the human amygdala
Source: PubMed Central journal article supplement (PMC6588589; doi:10.1038/s41467-019-10765-1), 2019-06-21
Supplement: 41467_2019_10765_MOESM3_ESM.pdf [file 41467_2019_10765_MOESM3_ESM.pdf]

## **Description of Additional Supplementary Files**

File Name: Supplementary Data 1

Description: Mixed linear models

File Name: Supplementary Data 2

Description: Cell metadata for the amygdala snRNA-seq dataset

File Name: Supplementary Data 3

Description: List of markers of immature PL neurons identified by unbiased analysis of snRNA-seq data
